# Supplementary material for: Tuning the architecture and properties of microstructured yttrium tungstate oxide hydroxide and lanthanum tungstate
Source: Royal Society of Chemistry journal article supplement (doi:10.1039/c3dt32699c), 2013-01-01
Supplement: c3dt32699c.pdf [file c3dt32699c.pdf]

## Supporting Information

# Tuning the architecture and properties of micro structured yttrium tungstate oxide hydroxide and lanthanum tungstate

*Anna M. Kaczmarek,<sup>\*†</sup> Ying-Ya Liu,<sup>‡</sup> Pascal Van Der Voort,<sup>‡</sup> Rik Van Deun<sup>\*†</sup>*

*<sup>†</sup>f-Element Coordination Chemistry Lab, Department of Inorganic and Physical Chemistry,  
Ghent University, Krijgslaan 281-S3, B-9000 Gent, Belgium*

*<sup>‡</sup>Center for Ordered Materials, Organometallics and Catalysis (COMOC), Department of  
Inorganic and Physical Chemistry, Ghent University, Krijgslaan 281-S3, B-9000 Gent, Belgium*

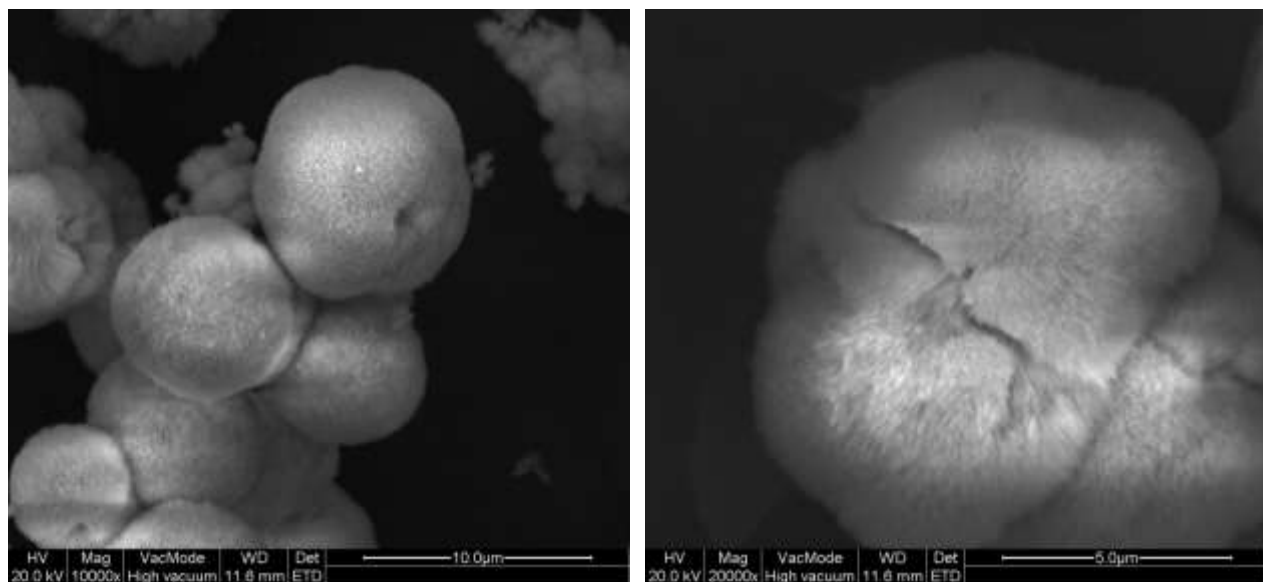

**Figure S1.** SEM images of 7.

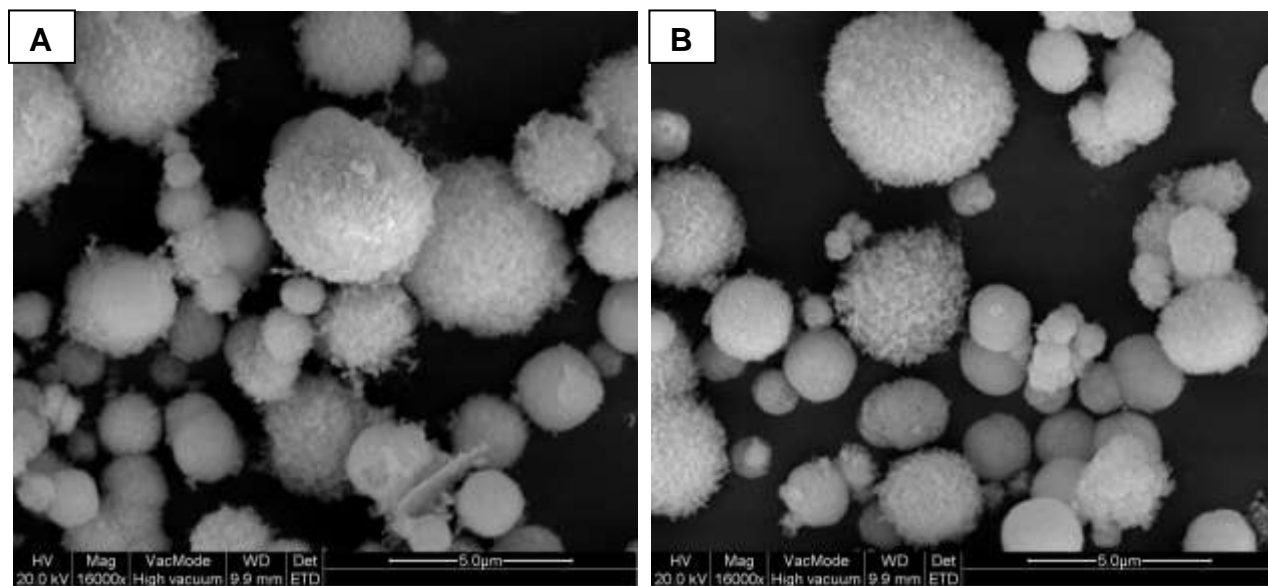

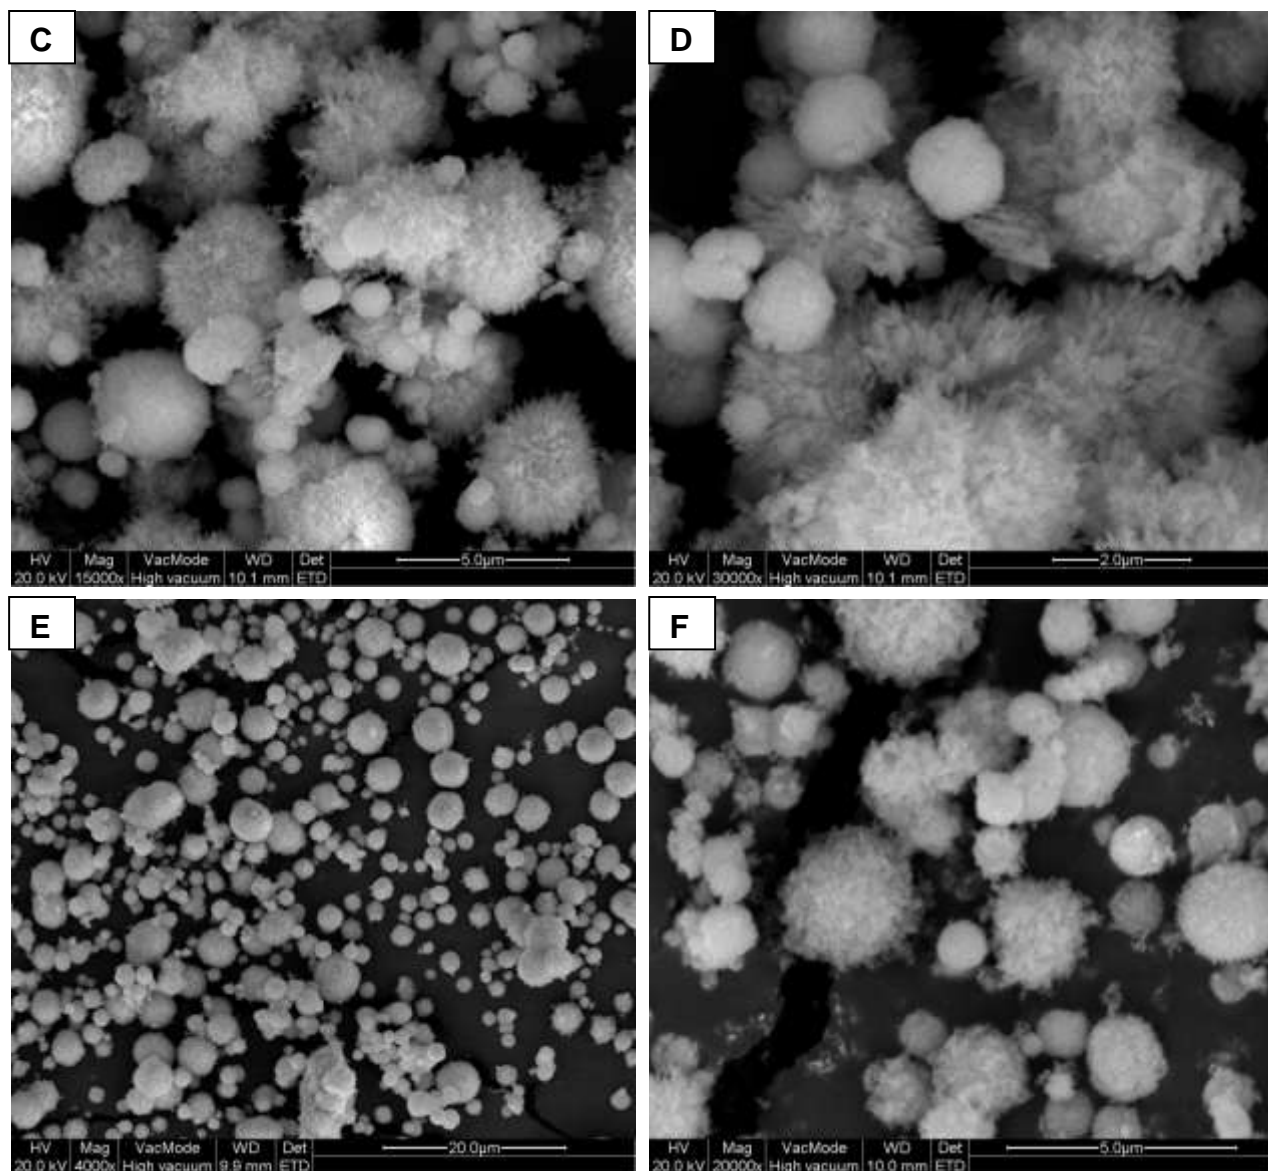

**Figure S2.** SEM images of (A, B) **10**, (C, D) **11**, (E, F) **12**.

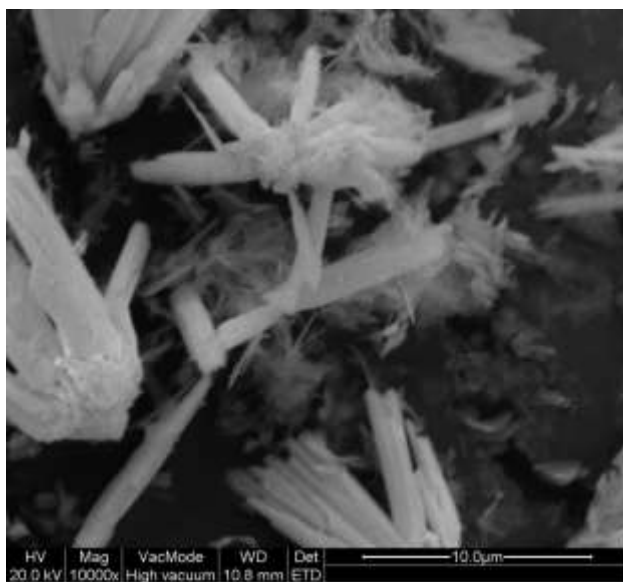

**Figure S3.** SEM image of **16** after a reaction time of 6 h.

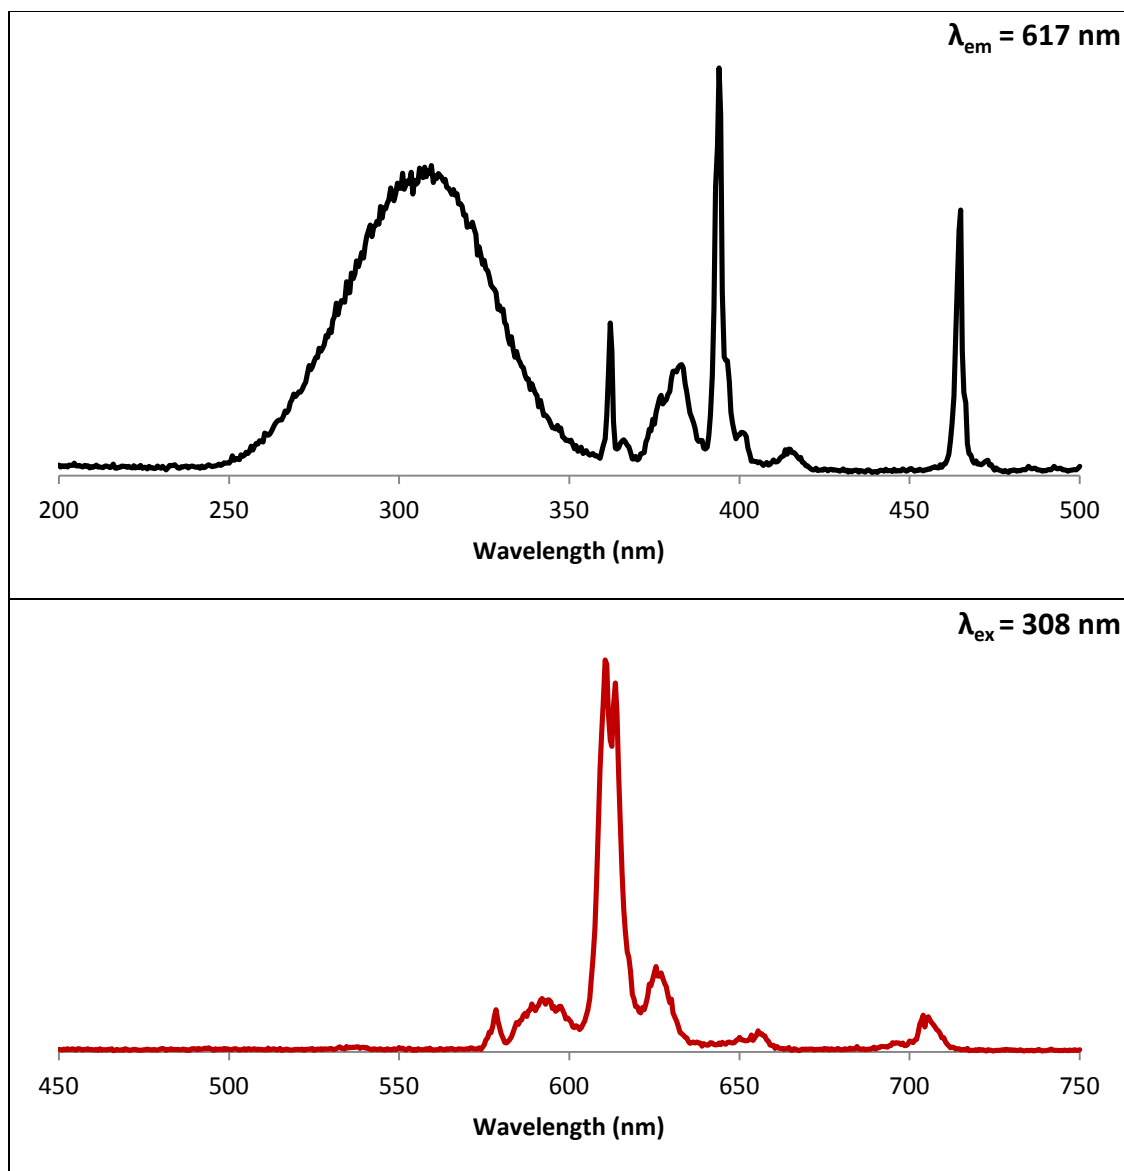

**Figure S4.** PL excitation and emission spectra of calcinated 5% Eu doped 6.

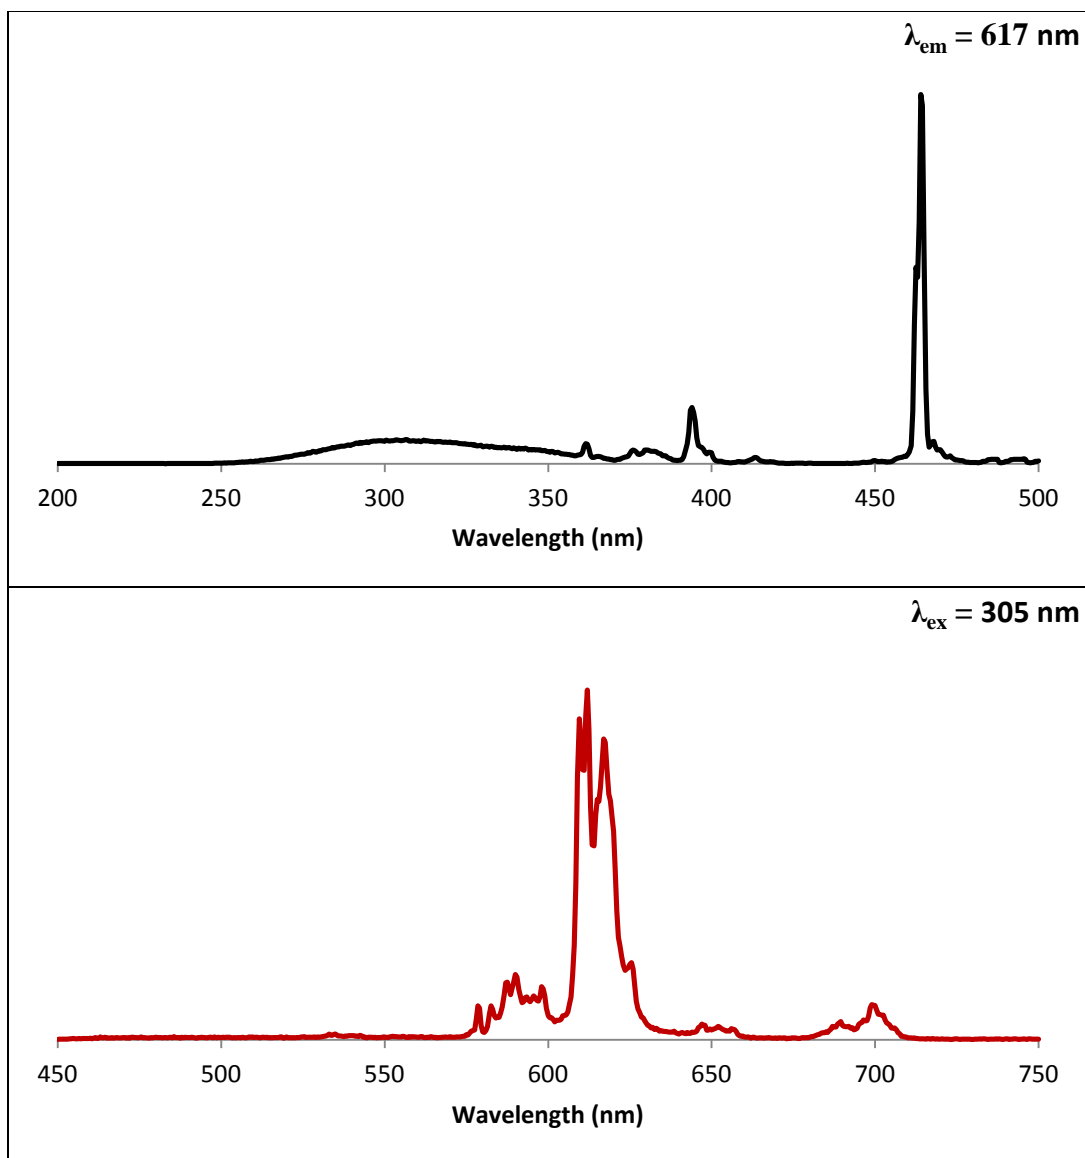

**Figure S5.** PL excitation and emission spectra of calcinated 5% Eu doped **15**.

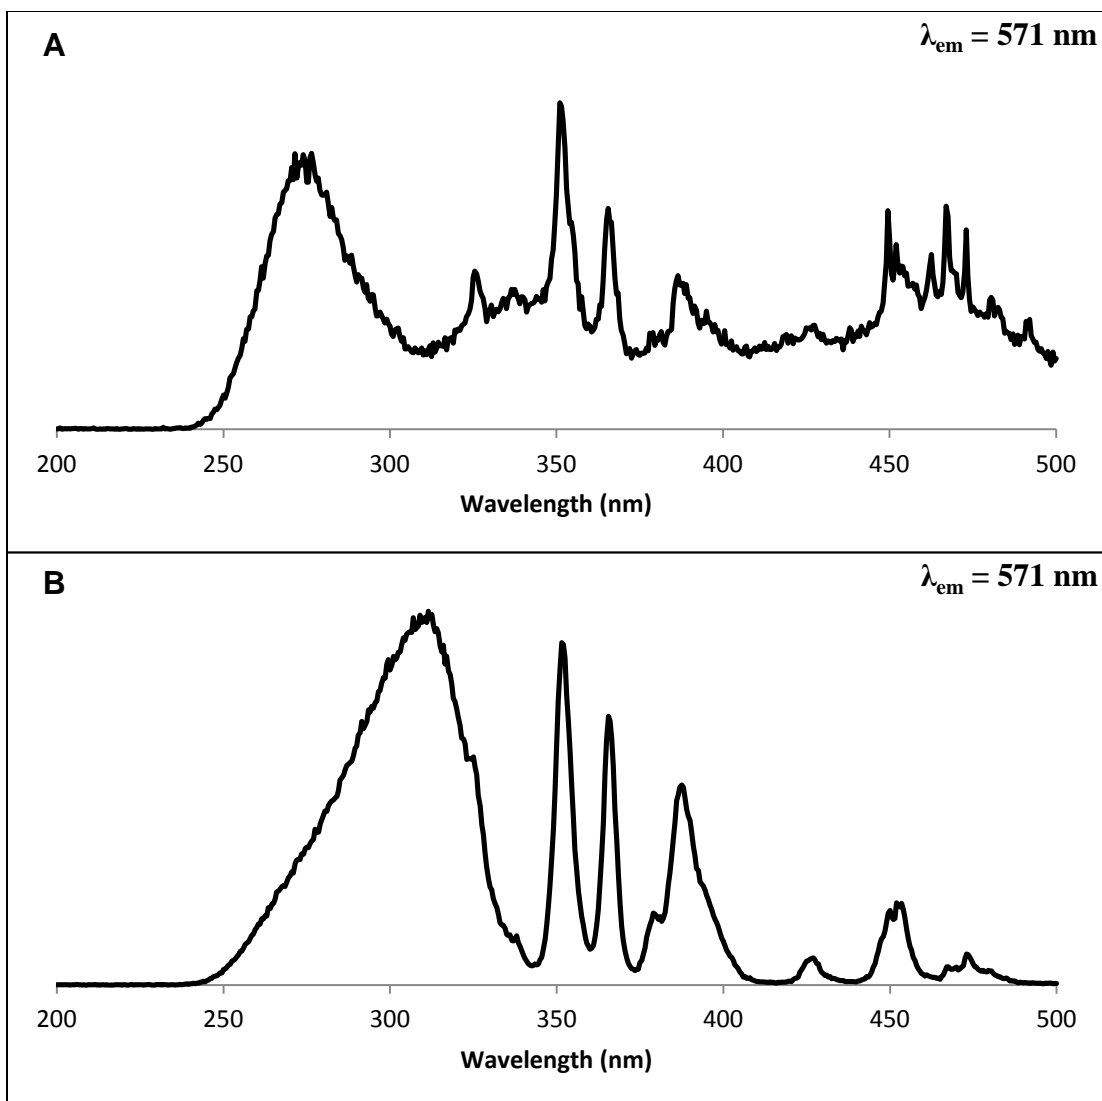

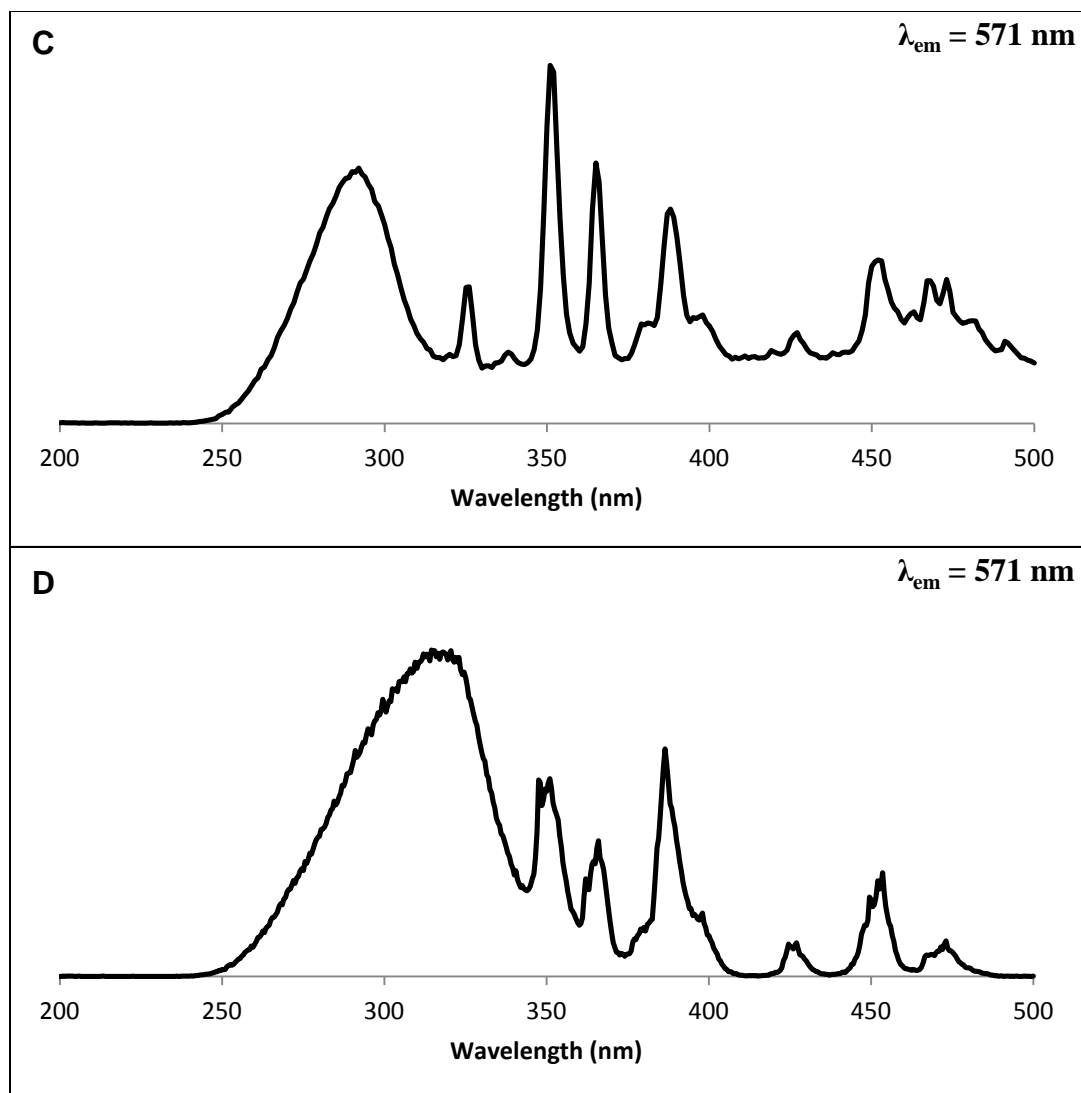

**Figure S6.** PL excitation spectra of 5% Dy doped (A) **6** precursor, (B) **6**, (C) **15** precursor, (D) **15**.
